# Supplementary material for: Manganese protoporphyrin IX reconstituted myoglobin capable of epoxidation of the CC bond with Oxone®
Source: Royal Society of Chemistry journal article supplement (doi:10.1039/c6qi00120c), 2016-01-01
Supplement: c6qi00120c1.pdf [file c6qi00120c1.pdf]

## Supporting Information

### **Manganese Protoporphyrin IX Reconstituted Myoglobin Capable of Epoxidation of C=C Bond with Oxone®**

**Yuan-Bo Cai,<sup>a</sup> Si-Yu Yao,<sup>a</sup> Mo Hu<sup>b</sup>, Xiaoyun Liu<sup>\*b</sup>, and Jun-Long Zhang<sup>\*a</sup>**

*<sup>a</sup> Beijing National Laboratory for Molecular Sciences, State Key  
Laboratory of Rare Earth Materials Chemistry and Applications, College  
of Chemistry and Molecular Engineering, Peking University, Beijing  
100871, P. R. China.*

Fax: (+86) 10-62767034

E-mail: [zhangjunlong@pku.edu.cn](mailto:zhangjunlong@pku.edu.cn)

*<sup>b</sup> Institute of Analytical Chemistry and Synthetic and Functional  
Biomolecules Center, College of Chemistry and Molecular Engineering,  
Peking University, Beijing 100871, P. R. China*

Fax: (+86) 10-62759813

E-mail: [xiaoyun.liu@pku.edu.cn](mailto:xiaoyun.liu@pku.edu.cn)

## Table of Contents

|    |                                                                                                     |    |
|----|-----------------------------------------------------------------------------------------------------|----|
| 1  | Kinetic studies of His3 Mn <sup>III</sup> Mb reacted with 20 equiv KHSO <sub>5</sub> .....          | 3  |
| 2. | Kinetic studies of F43H Mn <sup>III</sup> Mb reacted with 200 equiv KHSO <sub>5</sub> .....         | 4  |
| 3. | Kinetic studies of L29H Mn <sup>III</sup> Mb reacted with 200 equiv KHSO <sub>5</sub> .....         | 5  |
| 4. | Kinetic studies of H64F Mn <sup>III</sup> Mb reacted with 200 equiv KHSO <sub>5</sub> .....         | 6  |
| 5  | Kinetic studies of F43H/H64F Mn <sup>III</sup> Mb reacted with 200 equiv KHSO <sub>5</sub> .....    | 7  |
| 6  | Kinetic studies of L29H/H64F Mn <sup>III</sup> Mb reacted with 200 equiv KHSO <sub>5</sub> .....    | 8  |
| 7  | Kinetic studies of L29H/F43H/H64F Mn <sup>III</sup> Mb reacted with 200 equiv KHSO <sub>5</sub> ... | 9  |
| 8  | ESI-MS of apo His3 Mb with 20 equiv KHSO <sub>5</sub> .....                                         | 10 |
| 9  | LC/MS peaks of oxidized/unoxidized peptide HPGDFGADAQGAMNK.....                                     | 11 |
| 10 | Fragmentation patterns of peptide HPGDFGADAQGAM(Ox)NK.....                                          | 13 |
| 11 | <sup>1</sup> H NMR of styrene epoxidation catalyzed by His3 Mn <sup>III</sup> Mb.....               | 14 |
| 12 | Conversion and yield of styrene epoxidation at different pHs.....                                   | 15 |

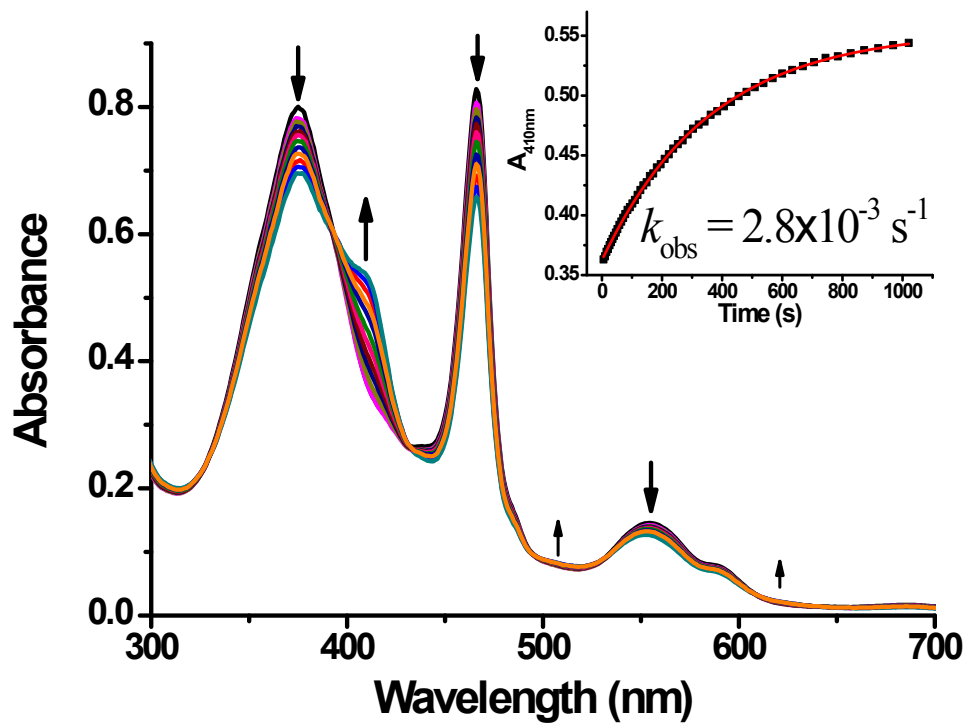

**Figure S1** Kinetic studies of 30  $\mu\text{M}$  His3 Mn<sup>III</sup>Mb reacted with 20 equiv KHSO<sub>5</sub> in PBS buffer (pH=7.4). Inset: Time course plots of absorbance at 410 nm, and corresponding rate constants of Mn=O formation.

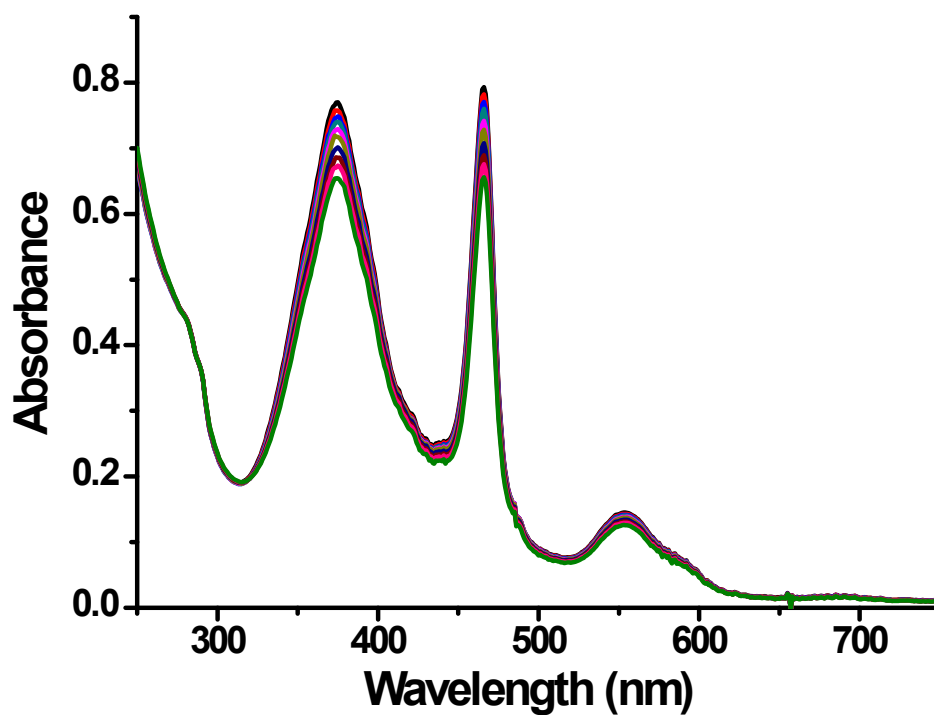

**Figure S2** Kinetic studies of 30  $\mu\text{M}$  F43H  $\text{Mn}^{\text{III}}$ Mb reacted with 200 equiv  $\text{KHSO}_5$  in PBS buffer (pH=7.4).

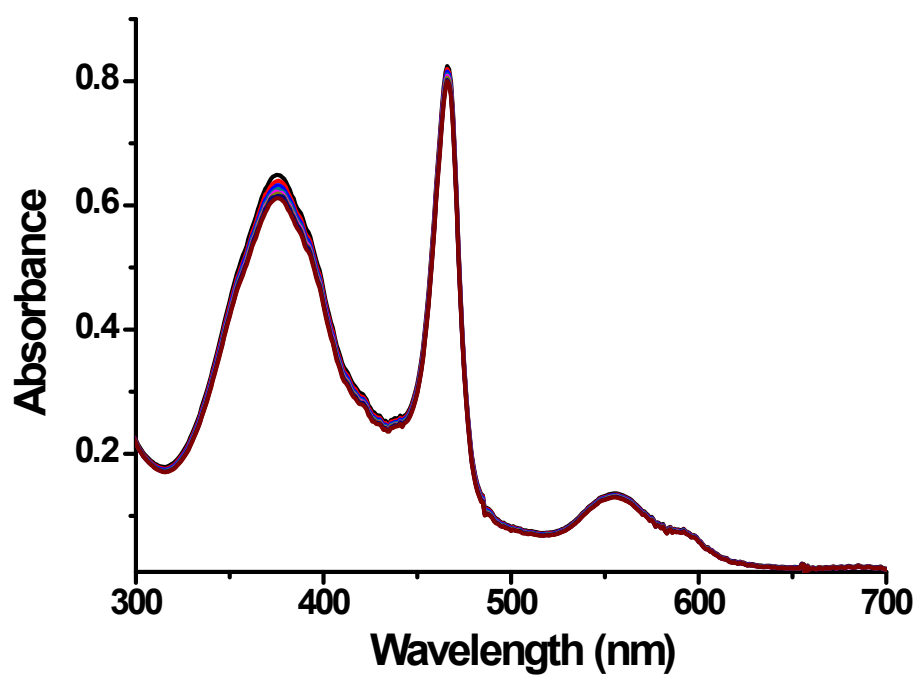

**Figure S3** Kinetic studies of 30 μM L29H Mn<sup>III</sup>Mb reacted with 200 equiv KHSO<sub>5</sub> in PBS buffer (pH=7.4).

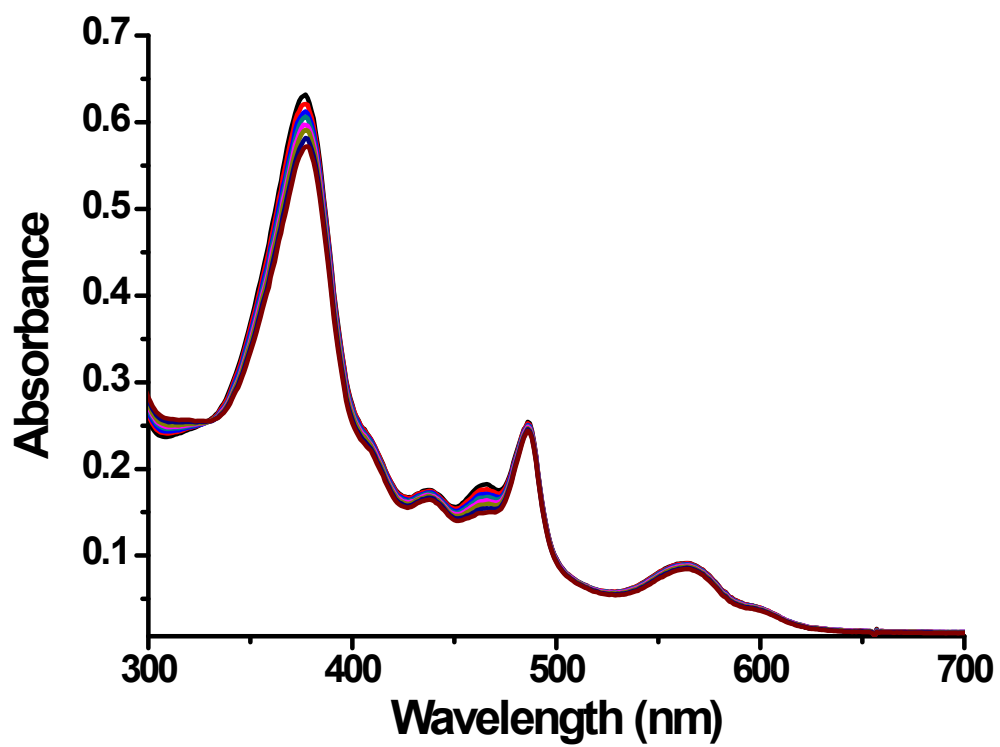

**Figure S4** Kinetic studies of 30  $\mu\text{M}$  H64F  $\text{Mn}^{\text{III}}$ Mb reacted with 200 equiv  $\text{KHSO}_5$  in PBS buffer (pH=7.4).

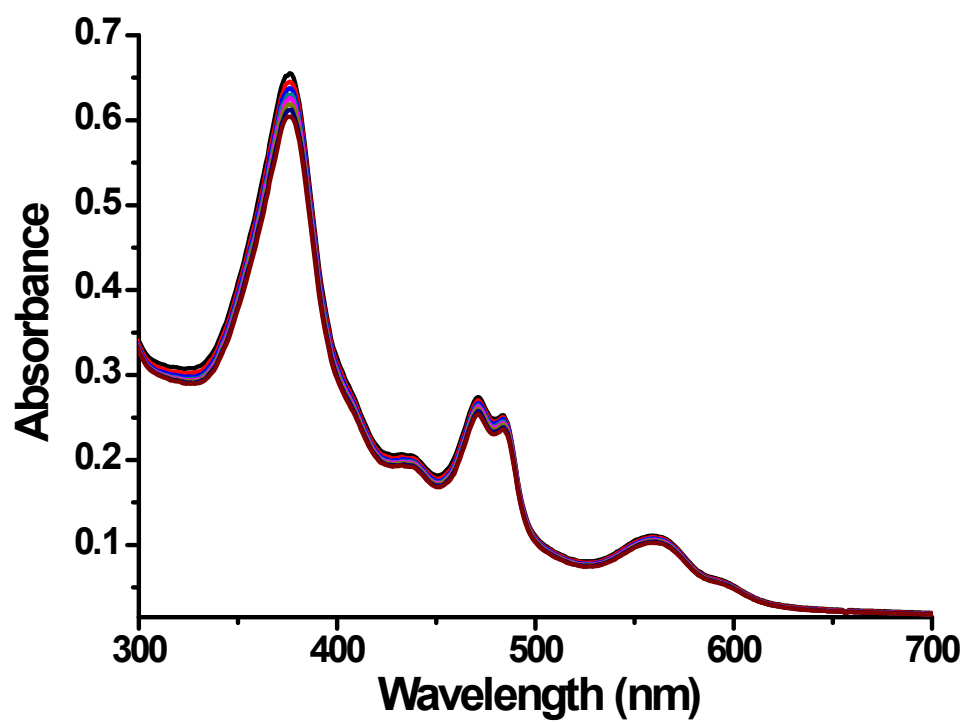

**Figure S5** Kinetic studies of 30  $\mu\text{M}$  F43H/H64F Mn<sup>III</sup>Mb reacted with 200 equiv KHSO<sub>5</sub> in PBS buffer (pH=7.4).

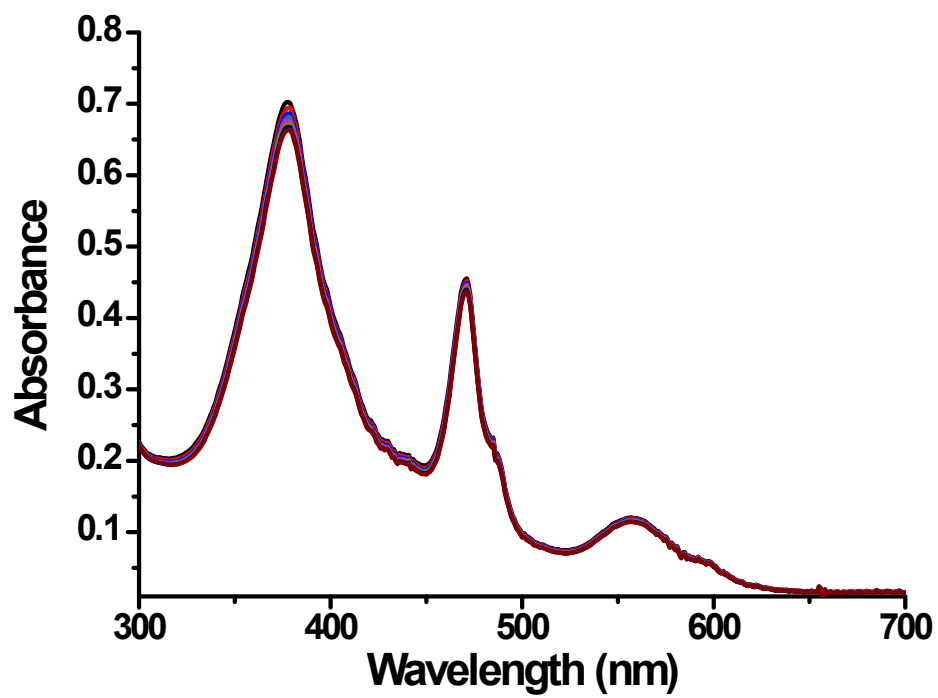

**Figure S6** Kinetic studies of 30  $\mu\text{M}$  L29H/H64F  $\text{Mn}^{\text{III}}\text{Mb}$  reacted with 200 equiv  $\text{KHSO}_5$  in PBS buffer (pH=7.4).



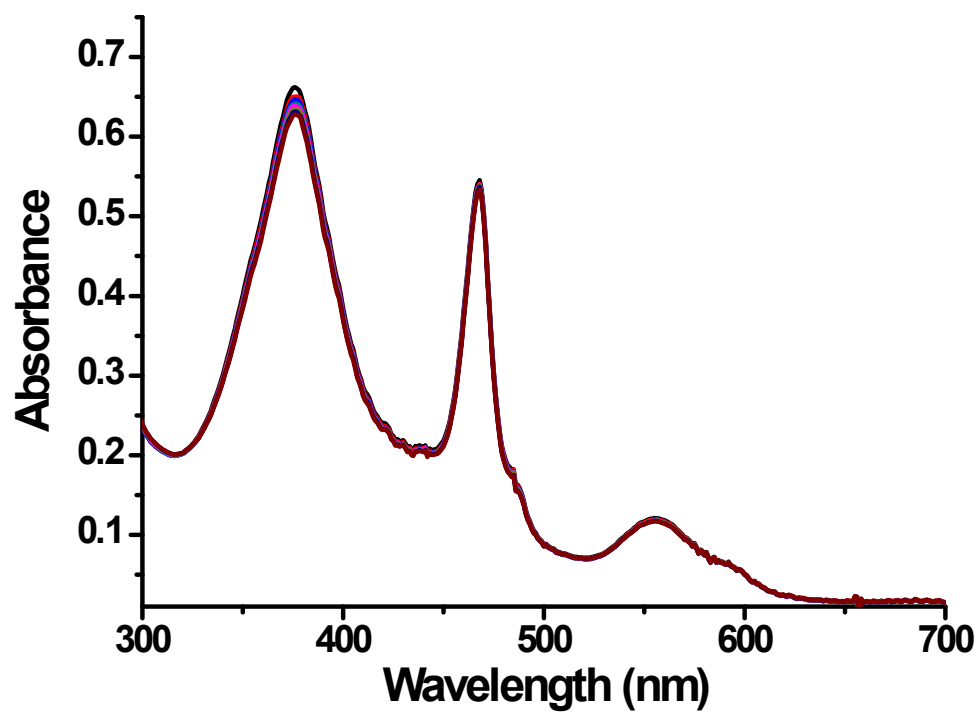

**Figure S7** Kinetic studies of 30  $\mu\text{M}$  L29H/F43H/H64F  $\text{Mn}^{\text{III}}$ Mb reacted with 200 equiv  $\text{KHSO}_5$  in PBS buffer (pH=7.4).

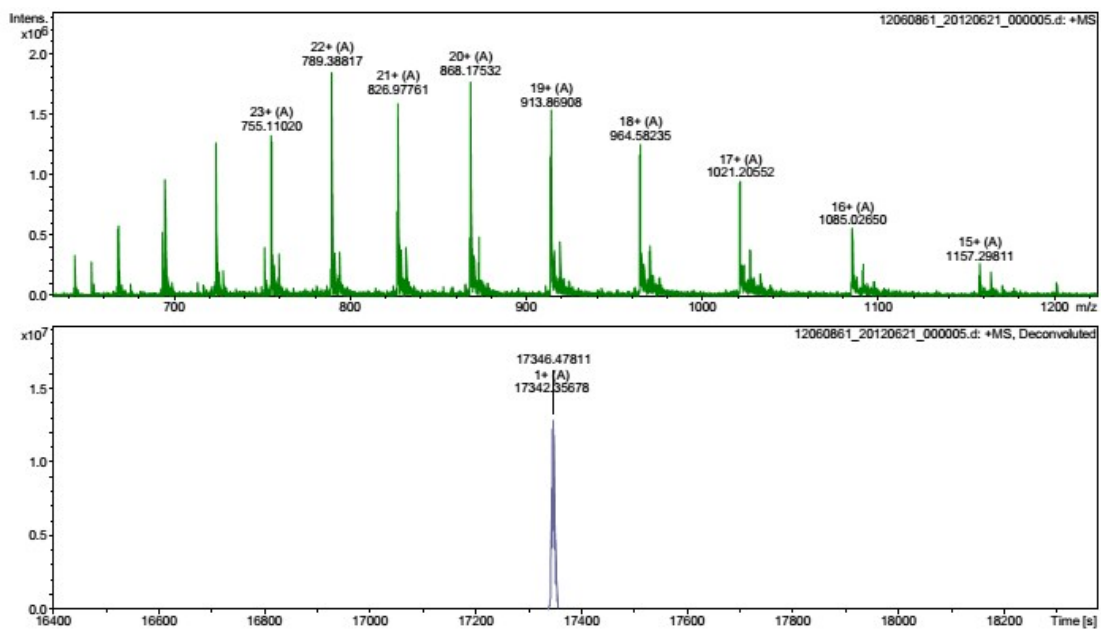

(b)

**Figure S8** ESI-MS of apo His3 Mb with 20 equiv KHSO<sub>5</sub> after reacting for 3 min.

RT: 6.60 - 16.86

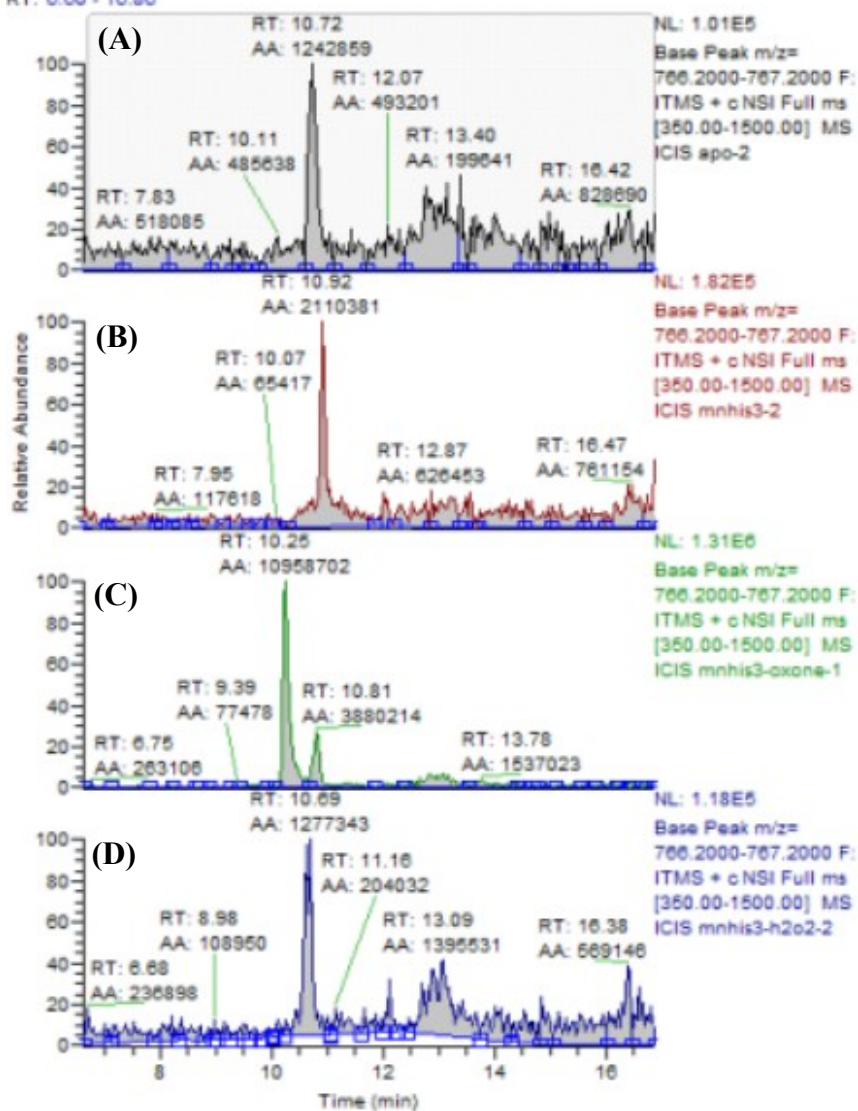

(a)

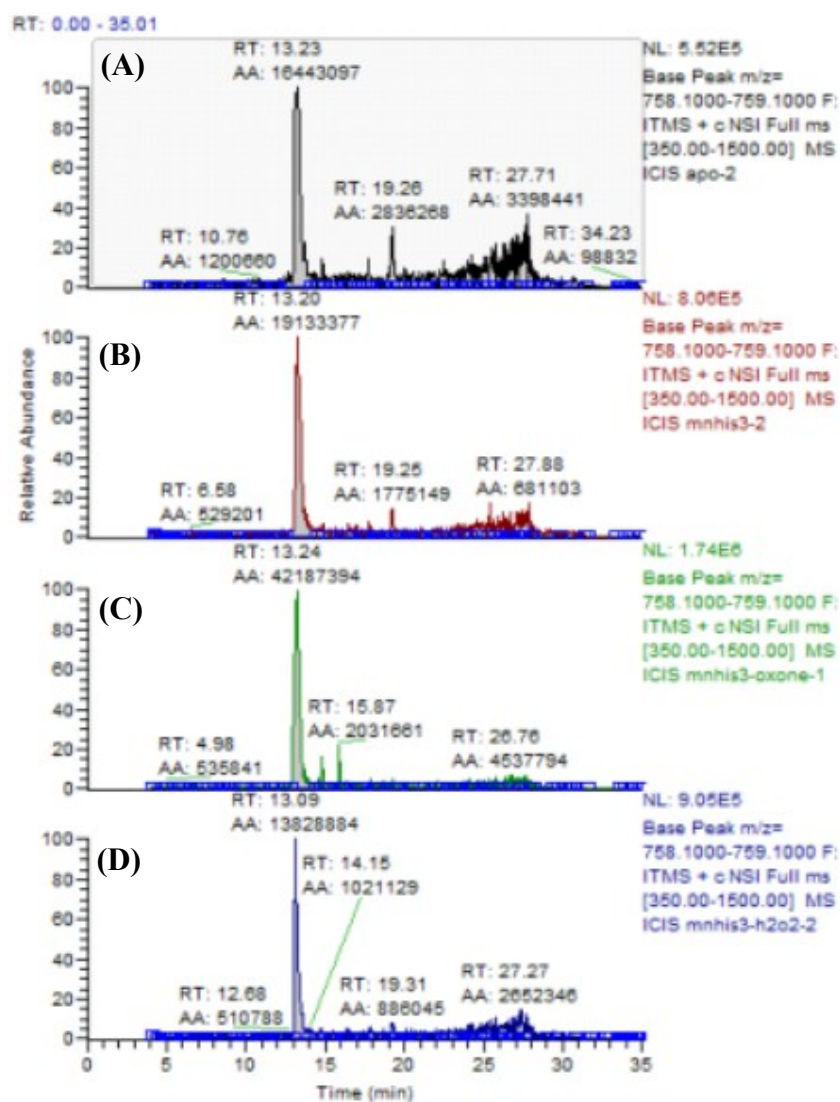

(b)

**Figure S9.** Retention times and peak areas of (a) oxidized and (b) unoxidized peptide HPGDFGADAQGAMNK in LC/MS. In each graph, A-D represent apo-His3 Mb with Oxone<sup>®</sup>, His3 Mn<sup>III</sup>Mb without any oxidants, His3 Mn<sup>III</sup>Mb with Oxone<sup>®</sup>, and His3 Mn<sup>III</sup>Mb with H<sub>2</sub>O<sub>2</sub>, respectively.

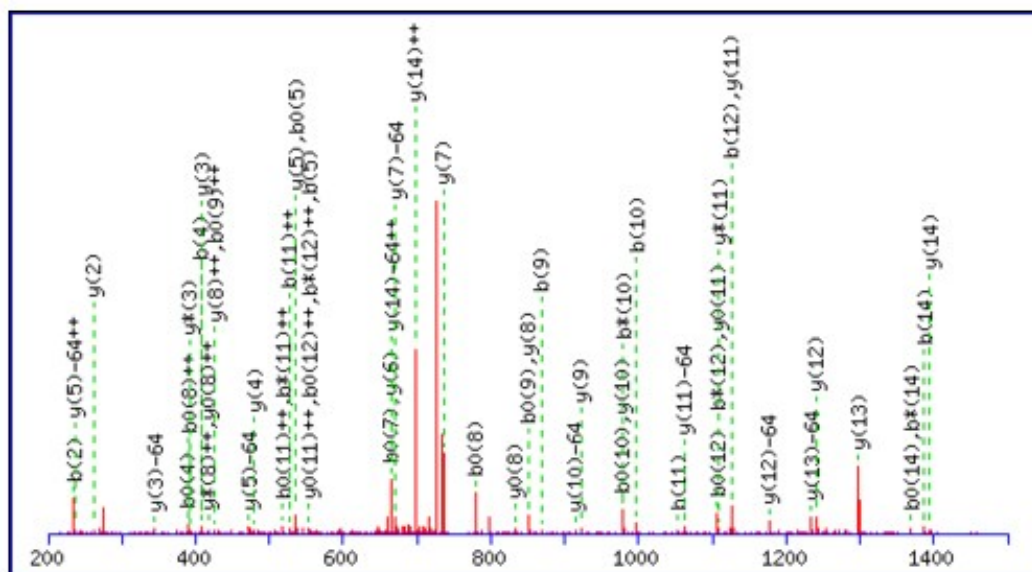

Average mass of neutral peptide Mr(calc): 1531.6057  
 Variable modifications:  
 M13 : Oxidation (M), with neutral losses 0.0000(shown in table), 64.1069  
 Ions Score: 112 Expect: 6.3e-012  
 Matches : 57/204 fragment ions using 74 most intense peaks ([help](#))

| #  | b                | b <sup>++</sup> | b <sup>+</sup> | b <sup>+++</sup> | b <sup>0</sup> | b <sup>0++</sup> | Seq. | y                | y <sup>++</sup> | y <sup>+</sup> | y <sup>+++</sup> | y <sup>0</sup> | y <sup>0++</sup> | #  |
|----|------------------|-----------------|----------------|------------------|----------------|------------------|------|------------------|-----------------|----------------|------------------|----------------|------------------|----|
| 1  | 138.1467         | 69.5770         |                |                  |                |                  | H    |                  |                 |                |                  |                |                  | 15 |
| 2  | <b>235.2619</b>  | 118.1346        |                |                  |                |                  | P    | <b>1395.4738</b> | <b>698.2406</b> | 1378.4433      | 689.7253         | 1377.4585      | 689.2329         | 14 |
| 3  | 292.3132         | 146.6603        |                |                  |                |                  | G    | <b>1298.3586</b> | 649.6830        | 1281.3281      | 641.1677         | 1280.3433      | 640.6753         | 13 |
| 4  | <b>407.4006</b>  | 204.2040        |                |                  | 389.3853       | 195.1964         | D    | <b>1241.3073</b> | 621.1573        | 1224.2768      | 612.6421         | 1223.2920      | 612.1497         | 12 |
| 5  | <b>554.5745</b>  | 277.7909        |                |                  | 536.5592       | 268.7833         | F    | <b>1126.2199</b> | 563.6136        | 1109.1894      | 555.0984         | 1108.2046      | 554.6060         | 11 |
| 6  | 611.6258         | 306.3166        |                |                  | 593.6105       | 297.3090         | G    | <b>979.0460</b>  | 490.0267        | 962.0155       | 481.5114         | 961.0307       | 481.0190         | 10 |
| 7  | 682.7037         | 341.8555        |                |                  | 664.6884       | 332.8479         | A    | <b>921.9947</b>  | 461.5010        | 904.9642       | 452.9858         | 903.9794       | 452.4934         | 9  |
| 8  | 797.7911         | 399.3992        |                |                  | 779.7758       | 390.3916         | D    | <b>850.9168</b>  | 425.9621        | 833.8863       | 417.4468         | 832.9015       | 416.9544         | 8  |
| 9  | <b>868.8690</b>  | 434.9382        |                |                  | 850.8537       | 425.9306         | A    | <b>735.8294</b>  | 368.4184        | 718.7989       | 359.9031         |                |                  | 7  |
| 10 | <b>996.9982</b>  | 499.0028        | 979.9677       | 490.4875         | 978.9829       | 489.9952         | Q    | <b>664.7515</b>  | 332.8794        | 647.7210       | 324.3642         |                |                  | 6  |
| 11 | <b>1054.0495</b> | 527.5284        | 1037.0190      | 519.0132         | 1036.0342      | 518.5208         | G    | <b>536.6223</b>  | 268.8148        | 519.5918       | 260.2996         |                |                  | 5  |
| 12 | <b>1125.1274</b> | 563.0674        | 1108.0969      | 554.5521         | 1107.1121      | 554.0598         | A    | <b>479.5710</b>  | 240.2892        | 462.5405       | 231.7739         |                |                  | 4  |
| 13 | 1272.3229        | 636.6651        | 1255.2924      | 628.1499         | 1254.3076      | 627.6575         | M    | <b>408.4931</b>  | 204.7502        | 391.4626       | 196.2350         |                |                  | 3  |
| 14 | <b>1386.4255</b> | 693.7164        | 1369.3950      | 685.2012         | 1368.4102      | 684.7088         | N    | <b>261.2976</b>  | 131.1525        | 244.2671       | 122.6372         |                |                  | 2  |
| 15 |                  |                 |                |                  |                |                  | K    | 147.1950         | 74.1012         | 130.1645       | 65.5859          |                |                  | 1  |

**Figure S10.** Fragmentation patterns of peptide from HPGDFGADAQGAM(Ox)NK the digestion of His3 Mn<sup>III</sup>Mb reacted with KHSO<sub>5</sub>.

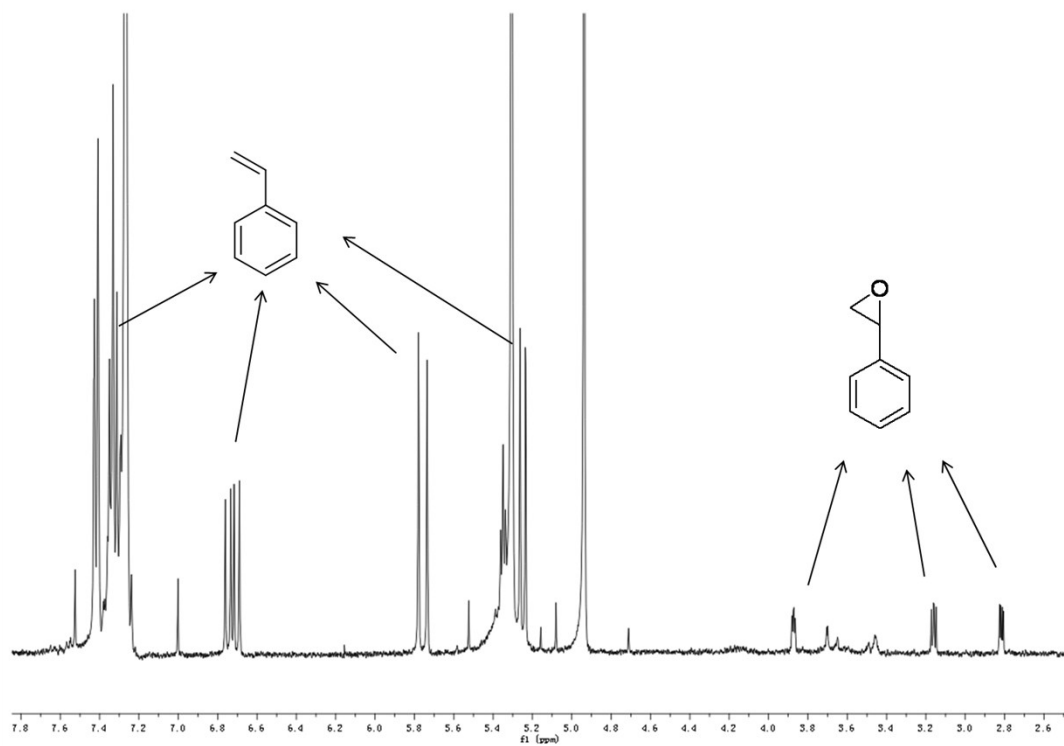

**Figure S11.** <sup>1</sup>H NMR after the reaction of styrene and Oxone<sup>®</sup> catalyzed by His3 Mn<sup>III</sup>Mb.

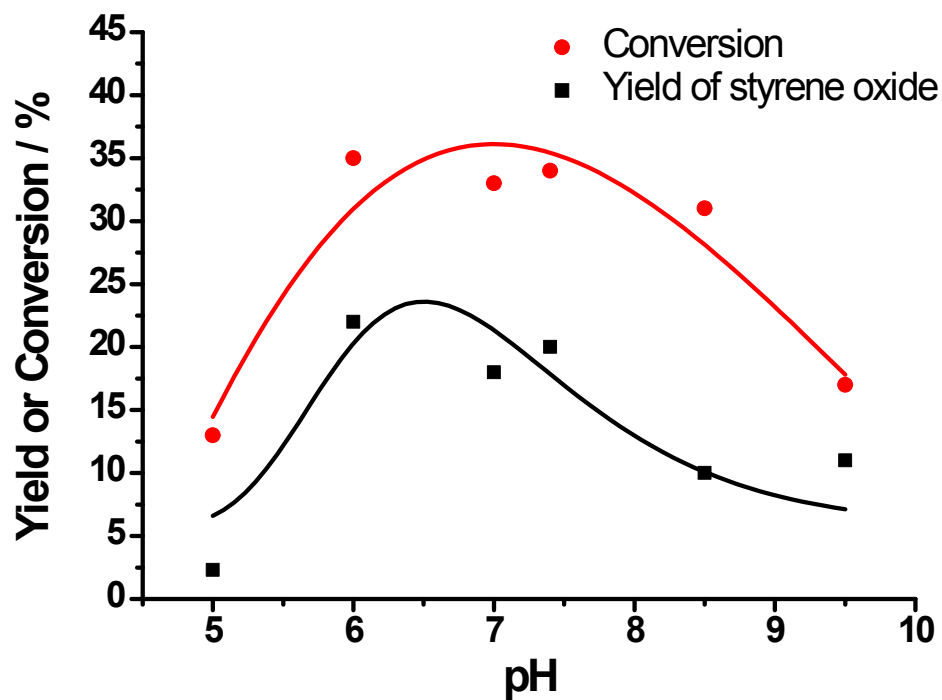

**Figure S12.** Conversion of epoxidation (red) and yield of styrene oxide (black) at different pHs. Conversion was calculated by  $1 - (\text{unreacted styrene} / \text{total added styrene})$ . Yield was based on styrene oxide generated / total added styrene.
